# Supplementary material
Source: Royal Society of Chemistry journal article supplement (doi:10.1039/d6nj01091a)
Supplement: d6nj01091a1.pdf [file d6nj01091a1.pdf]

## Supporting Information

### **Synergistic Effects of Oxygen Vacancies and Metal-Support Interaction in Rare Earth-Modified Cu-ZnO-Al<sub>2</sub>O<sub>3</sub> Catalysts for CO<sub>2</sub> Hydrogenation to Methanol**

Dan Xie<sup>a</sup>, Zhihao Wu<sup>a</sup>, Lulu Zhou<sup>a</sup>, Weiquan Feng<sup>c</sup>, Jie Cheng<sup>d</sup>, Yue Li<sup>b\*</sup>, Yongdong Chen<sup>a, b, c\*</sup>

<sup>a</sup> College of Chemistry and Chemical Engineering, Southwest Petroleum University, Chengdu 610500, China. E-

mail: yongdongchen@swpu.edu.cn.

<sup>b</sup> Tianfu Yongxing Laboratory, Chengdu 610203, China. E-mail: yueli0830@163.com.

<sup>c</sup> Zhejiang Dongjiang Green Petrochemical Technology Innovation Center Co., Ltd, Ningbo 315048, China.

<sup>d</sup> Zigong Tianlong Chemical Co., Ltd, Zigong 643000, China.

## Characterization of catalysts

Powder X-ray diffraction (XRD) was conducted using a DX2700 apparatus with Cu K $\alpha$  radiation. The range of  $2\theta$  is from  $10^\circ$  to  $90^\circ$ , with a step increment of  $0.02^\circ$ . All catalysts underwent pretreatment at  $300^\circ\text{C}$  under 10 vol%  $\text{H}_2/\text{N}_2$  for an hour prior to testing.

The Brunauer-Emmett-Teller (BET) specific surface area and pore size distribution were determined from the nitrogen adsorption-desorption isotherms at  $-196^\circ\text{C}$  using a V-Sorb-2802TP instrument. All catalysts were pretreated at  $300^\circ\text{C}$  for 1 hour in a 10 vol%  $\text{H}_2/\text{N}_2$ , and the reduced samples were degassed at  $200^\circ\text{C}$  for 6 hours to clean the surface prior to the measurement. The specific surface area was calculated by fitting the Brunauer-Emmett-Teller (BET) equation, whereas the pore size and pore volume were determined using the Barrett-Joyner-Halenda (BJH) model.

Analysis using a transmission electron microscope (TEM) and the EDX mapping analyses was conducted on the Talos F200S. All catalysts required pretreatment at  $300^\circ\text{C}$  for an hour under 10 vol%  $\text{H}_2/\text{N}_2$ . The statistical Cu particle size of the sample was determined using Nano Measurer software.

Spectroscopy (XPS) was recorded on a Thermo ESCALAB -250XI (16KV 14.9mA) with Al K $\alpha$  radiation. All catalysts were pre-treated at  $300^\circ\text{C}$  for 1 h under 10 vol%  $\text{H}_2/\text{N}_2$ .

Carbon dioxide temperature-programmed desorption ( $\text{CO}_2$ -TPD) and hydrogen temperature-programmed reduction ( $\text{H}_2$ -TPR) experiments were both carried out in a quartz U-tube reactor, using a Xian quan TP5076 automatic adsorption instrument. For  $\text{CO}_2$ -TPD measurements: 100 mg of calcined sample was in-situ reduced at  $300^\circ\text{C}$  for 60 min with a flowing 10 vol%  $\text{H}_2/\text{N}_2$  (flow rate:  $40\text{ mL min}^{-1}$ ). After the sample was cooled to room temperature, it was exposed to a  $\text{CO}_2$  stream (flow rate:  $40\text{ mL min}^{-1}$ ) until adsorption saturation, followed by purging with high-purity helium (He) for 30 min to flatten the baseline. The TPD test was performed in the temperature range of  $30$ - $900^\circ\text{C}$  at a heating rate of  $10^\circ\text{C min}^{-1}$ , with He serving as the carrier gas throughout the process. For  $\text{H}_2$ -TPR measurements: 50 mg of calcined sample was in-situ pretreated at  $300^\circ\text{C}$  for 60 min with a flowing  $\text{N}_2$  stream (flow rate:  $40\text{ mL min}^{-1}$ ). After the pretreatment was completed and the sample was cooled to room temperature, a 10 vol%  $\text{H}_2/\text{N}_2$  mixture was introduced, and data recording was initiated simultaneously while heating to  $500^\circ\text{C}$  at a rate of  $10^\circ\text{C min}^{-1}$ .

In-situ diffuse reflectance Fourier transform infrared spectroscopy (DRIFTS) was performed on a Bruker INVENIO SFTIR equipped with a mercury-cadmium-telluride (MCT) detector following the procedure described below. The test was conducted with a spectral resolution of  $4\text{ cm}^{-1}$  and a scanning range of  $800\text{-}4000\text{ cm}^{-1}$  to evaluate the surface intermediate species during  $\text{CO}_2$  adsorption and hydrogenation. Prior to the test, 50 mg of unreduced catalyst was In-situ reduced at  $300\text{ }^\circ\text{C}$  for 1 h in a 10 vol%  $\text{H}_2/\text{N}_2$  atmosphere with a flow rate of  $30\text{ mL min}^{-1}$ . Subsequently, the catalyst was purged with  $\text{N}_2$  for 30 min to remove physically adsorbed  $\text{H}_2$ , then cooled to  $220\text{ }^\circ\text{C}$ , and the background spectrum was collected. Finally, the  $\text{N}_2$  was replaced with the feed gas mixture ( $\text{CO}_2/\text{H}_2 = 1/3$ ), and the time-dependent evolution of intermediate products was recorded to obtain infrared spectra with a resolution of  $4\text{ cm}^{-1}$ . Meanwhile, After the same pretreatment procedure described above, in-situ  $\text{CO}_2$  adsorption DRIFTS tests were performed by introducing pure  $\text{CO}_2$  into the reaction chamber. The dynamic evolution of surface adsorbed species and reaction intermediates was continuously recorded to clarify the  $\text{CO}_2$  activation pathway over the catalyst surface.

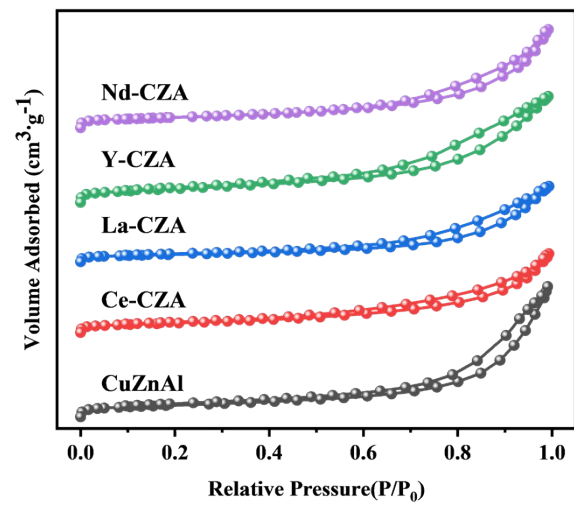

**Fig. S1** The N<sub>2</sub> adsorption-desorption curves of the reduced CuZnAl and RE-CZA catalysts.

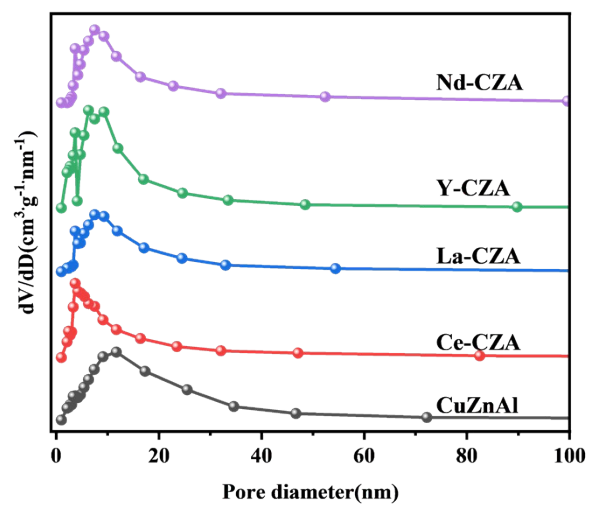

Fig. S2 The pore size distribution curves of the reduced CuZnAl and RE-CZA catalysts.

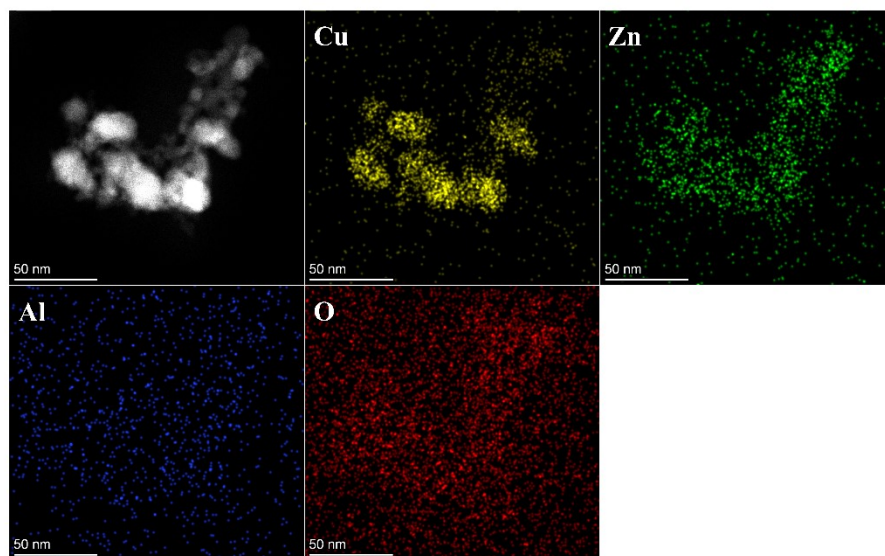

**Fig. S3** HAADF-STEM and corresponding element mapping of CuZnAl catalyst.

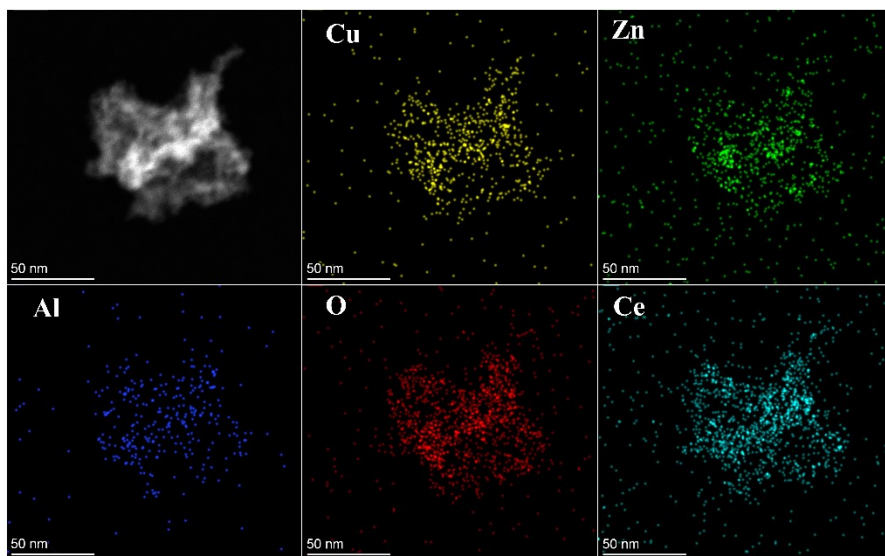

**Fig. S4** HAADF-STEM and corresponding element mapping of Ce-CZA catalyst.

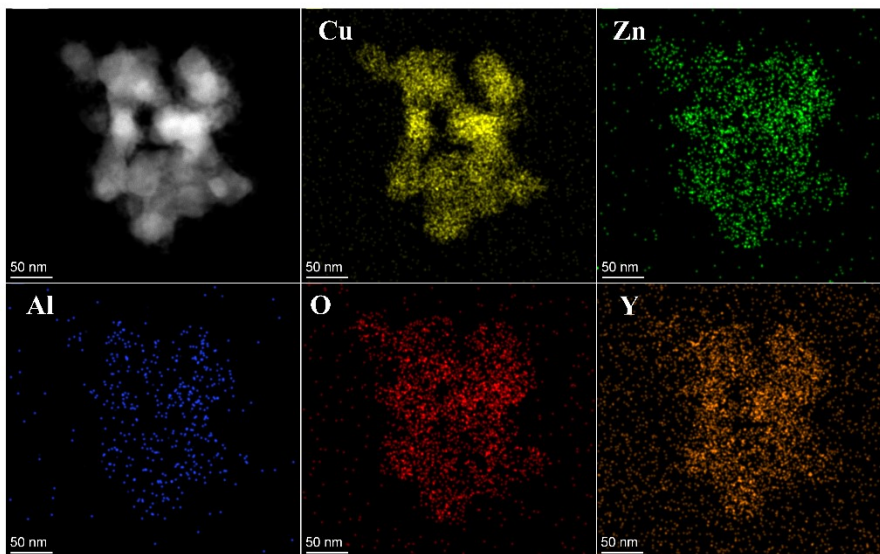

**Fig. S5** HAADF-STEM and corresponding element mapping of Y-CZA catalyst.

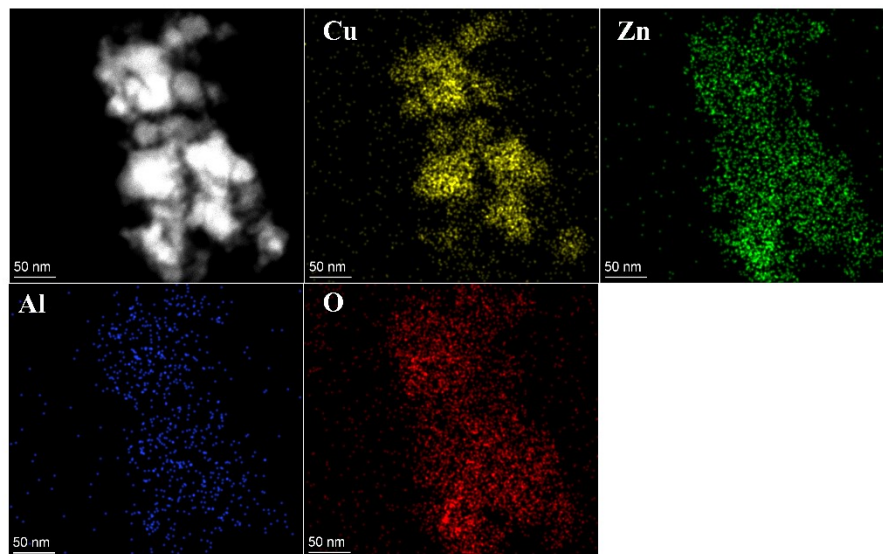

**Fig. S6** HAADF-STEM and corresponding element mapping of the spent CuZnAl.

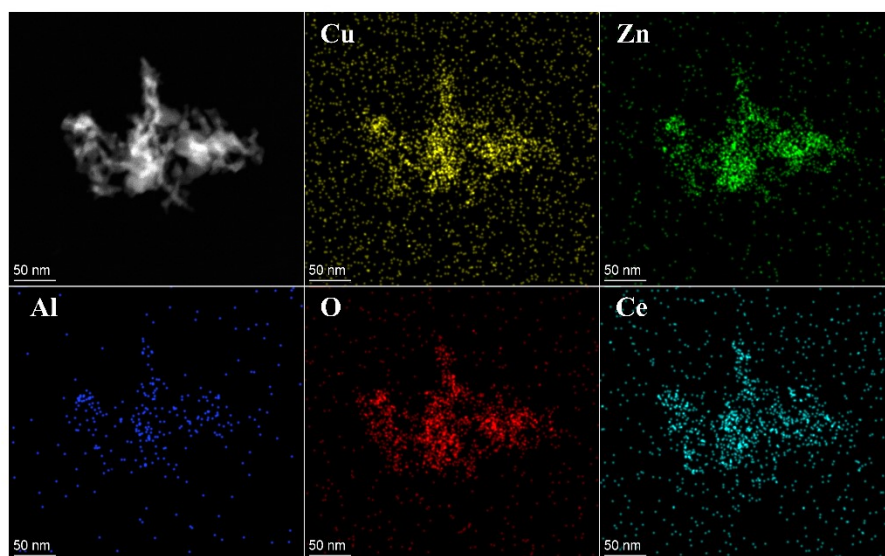

**Fig. S7** HAADF-STEM and corresponding element mapping of the spent Ce-CZA catalyst.

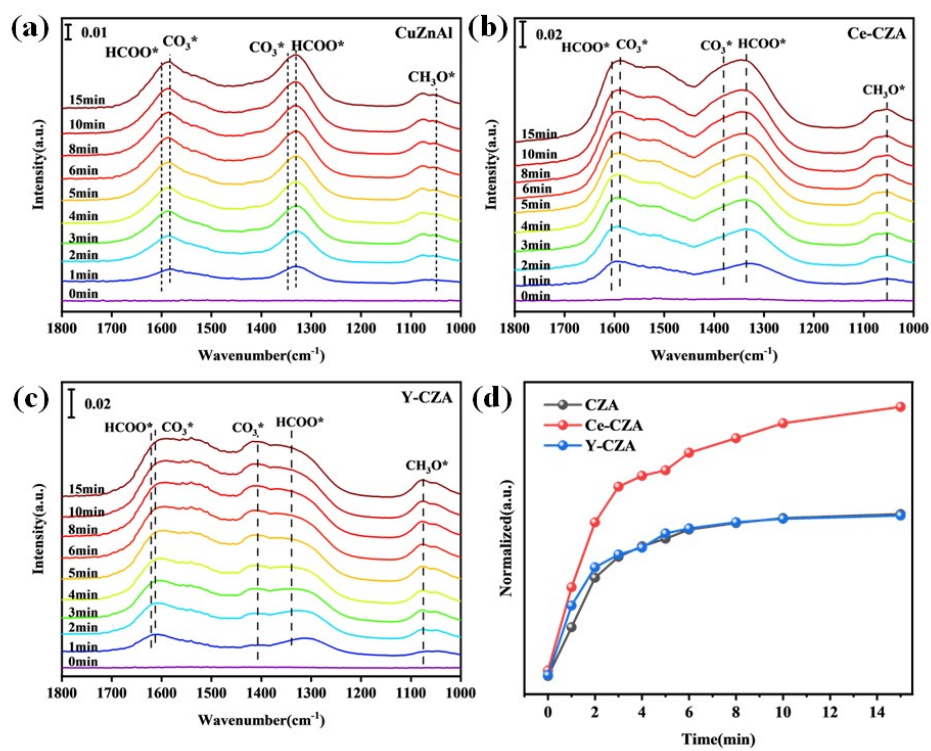

**Fig. S8** (a-c) In-situ DRIFTS for CO<sub>2</sub> adsorption: CuZnAl, Ce-CZA and Y-CZA (c) Normalization of the peak area of HCOO\*.

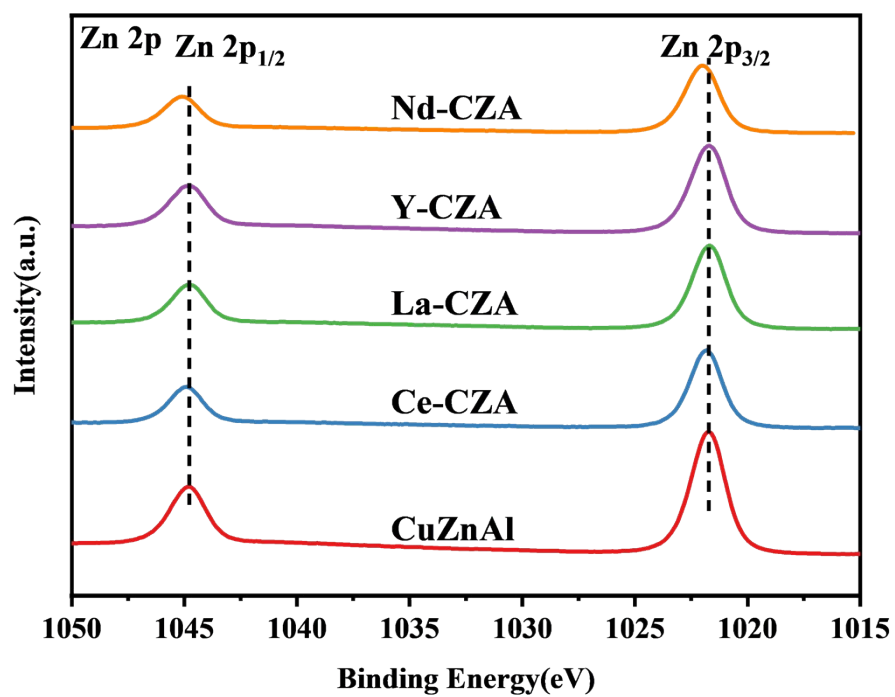

Fig. S9 Zn 2p spectra of the reduced CuZnAl and RE-CZA catalysts.

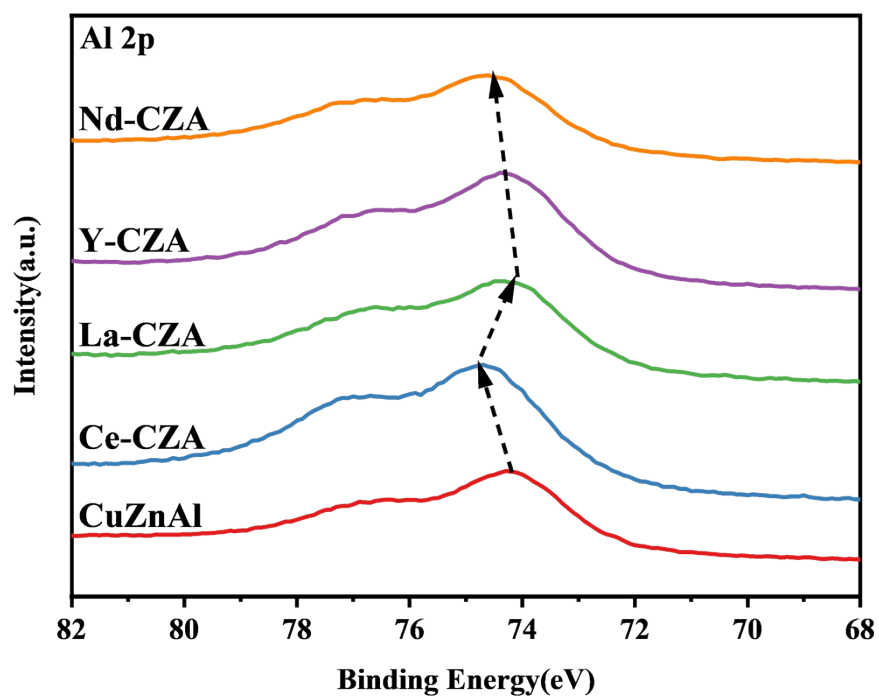

Fig. S10 Al 2p spectra of the reduced CuZnAl and RE-CZA catalysts.

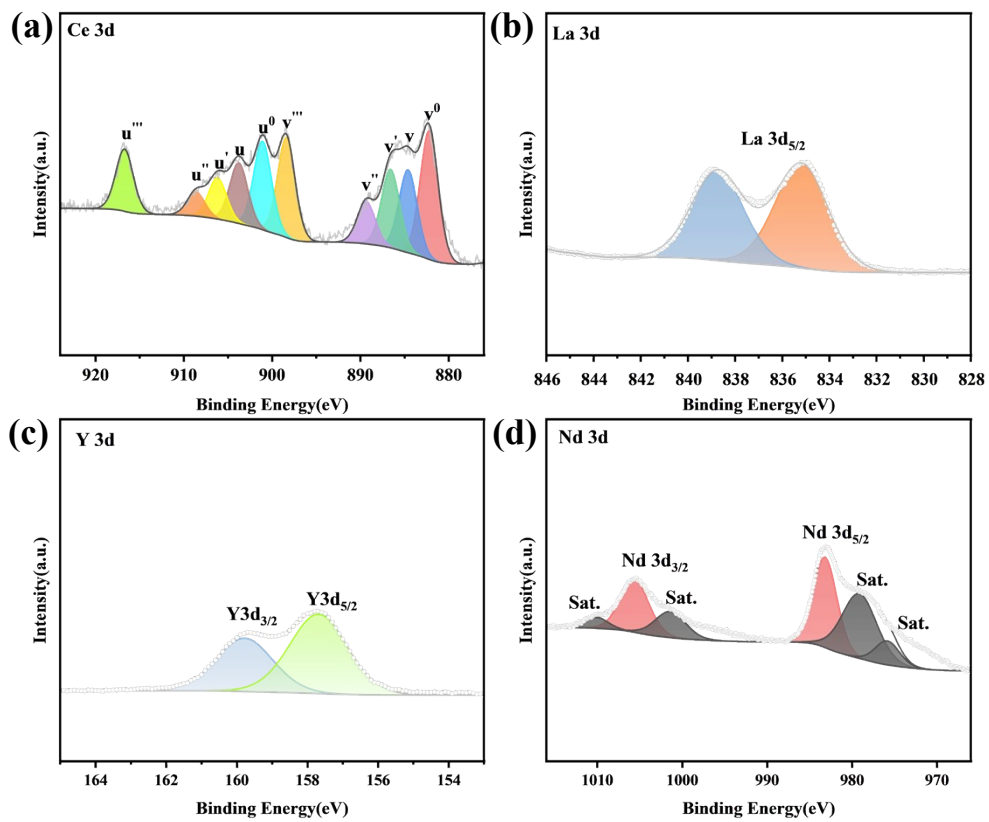

**Fig. S11** RE 3d spectra of the reduced RE-CZA catalysts. (a)Ce 3d (b)La 3d (c)Y 3d (d)Nd 3d.

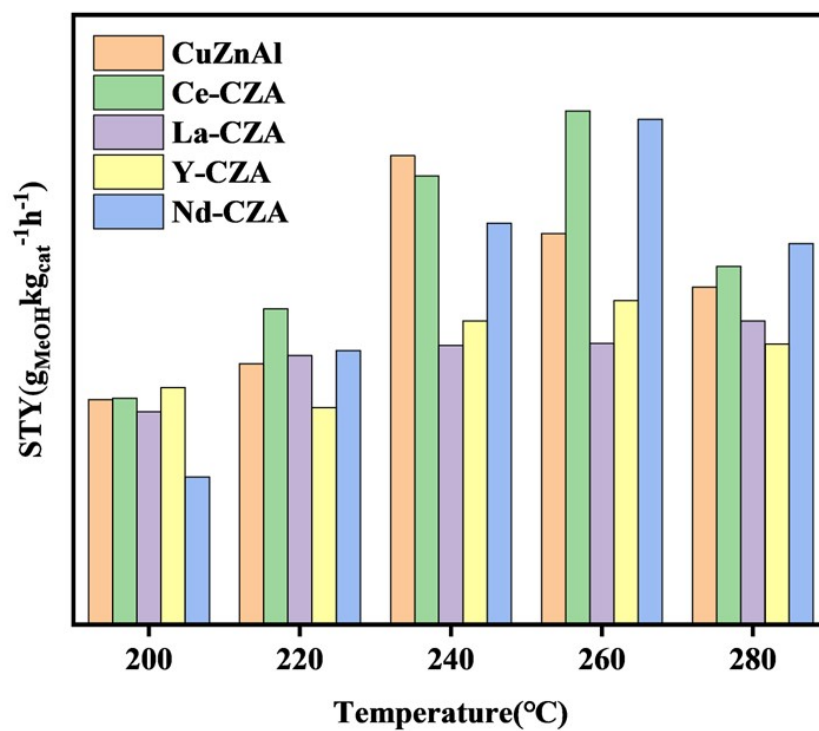

Fig. S12 Methanol space-time yield of CuZnAl and RE-CZA catalysts in the range of 200-280 °C.

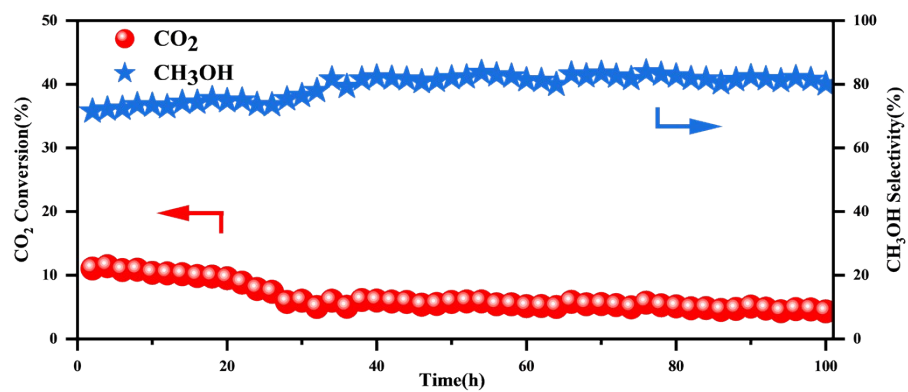

Fig. S13 Long-term stability of the Ce-CZA catalyst.
